# Supplementary material for: Nicotinamide Exerts Antioxidative Effects on Senescent Cells
Source: PubMed Central journal article supplement — Mol Cells. 2015 Jan 19;38(3):229–35. doi: 10.14348/molcells.2015.2253 (PMC4363722; doi:10.14348/molcells.2015.2253), 2015-01-19
Supplement: molcell-38-3-229-supple.pdf [file molcell-38-3-229-supple.pdf]

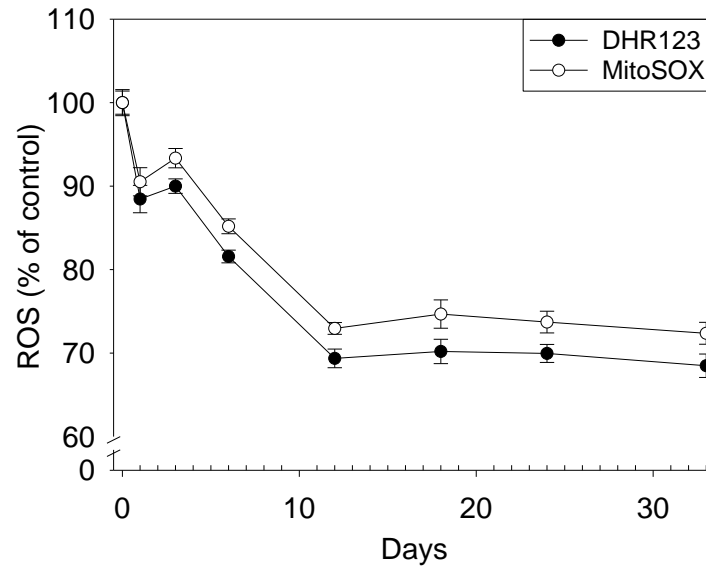

Supplemental Fig. 1. Treatment of NAM caused a decrease in mitochondrial (—○—) as well as cytosolic superoxides (—●—) in MCF-7 cells. The levels both of the superoxides decreased gradually, and were lowered by 20 % in 5 days and 30 % in 10 days.

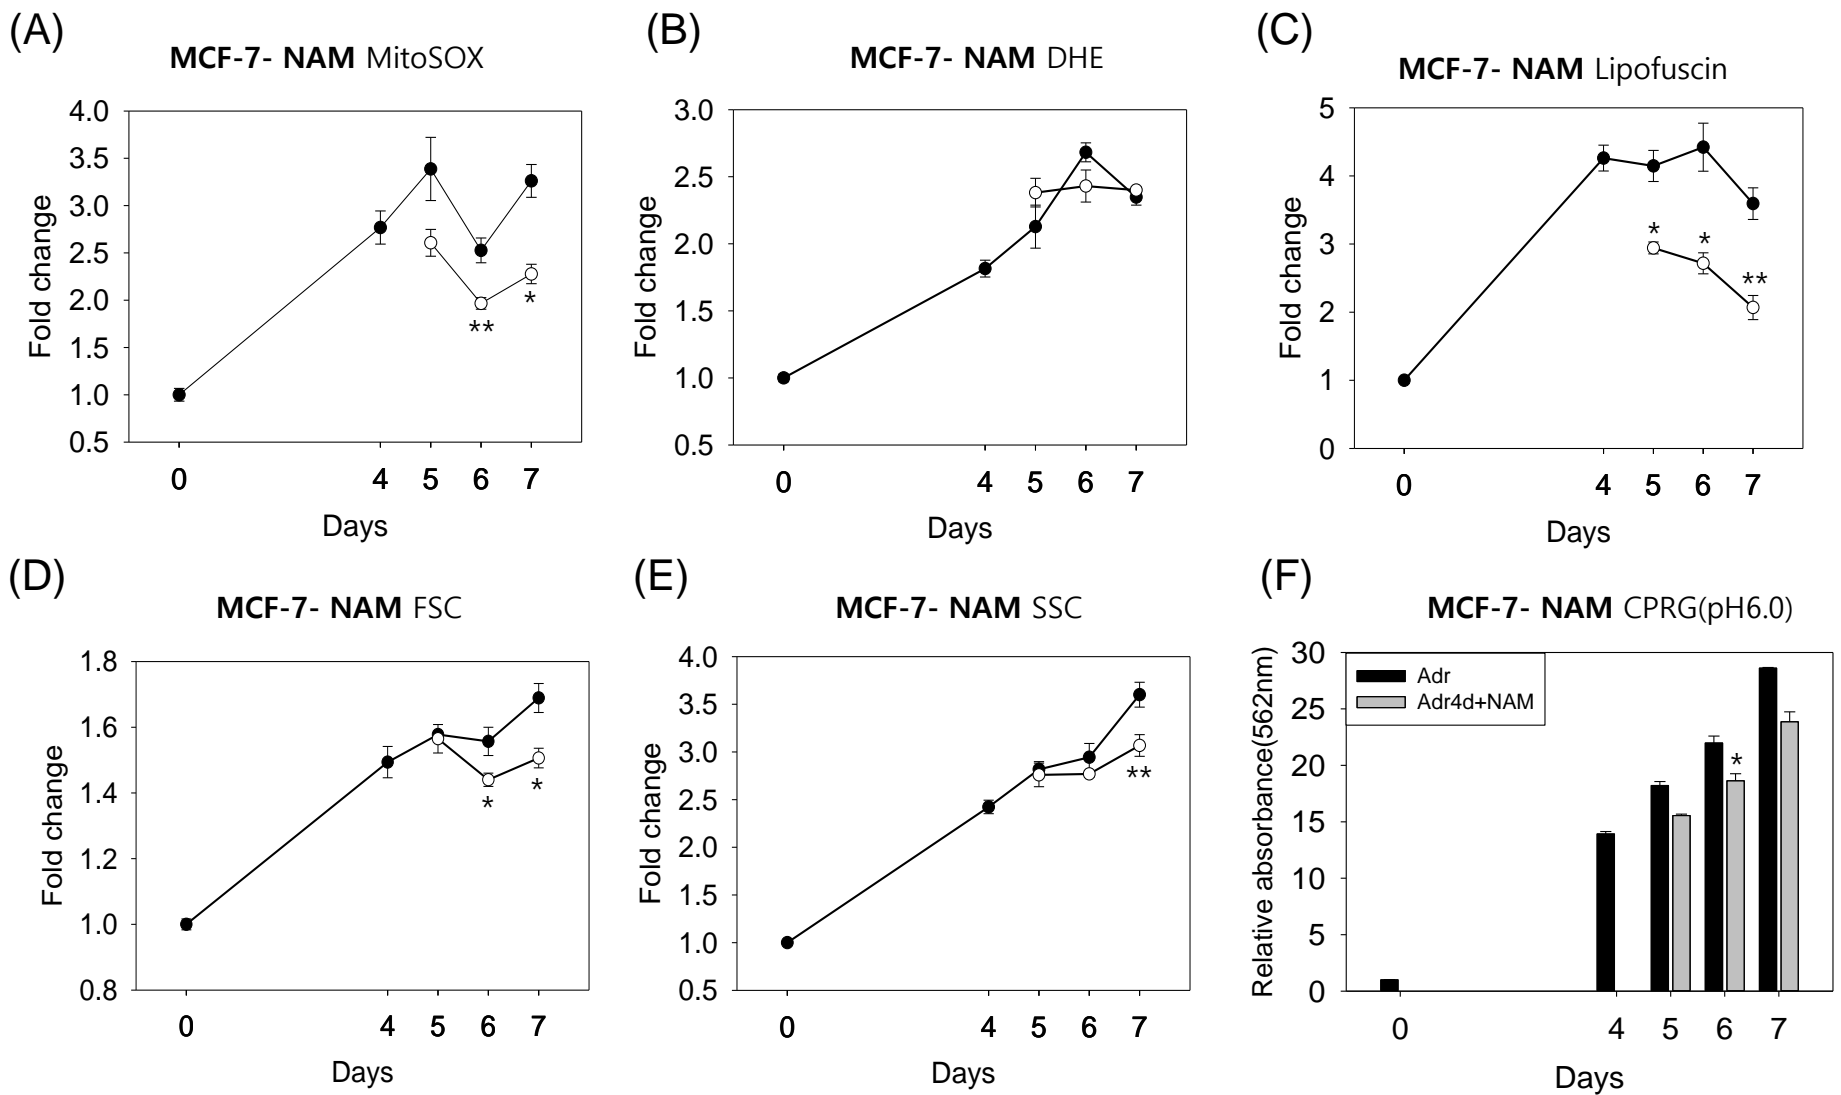

Supplemental Fig. 2. MCF-7 cells were fed with 5 mM NAM (—○—) or mock treated (—●—) at the 4<sup>th</sup> day of the chased, and incubated for 1, 2, or 3 additional days. Cells then were stained and applied to flow cytometry to determine the levels of mitochondrial (A) and cytosolic superoxides (B), lipofuscins (C), cell volume (D), and granule content (E). An equal numbers of cells were also lysed, and the extract was applied to CPRG-in solution assay for quantification of  $\beta$ -galactosidase activity. (A)-(E) In all the experiments, the mean values from triplicate experiments were used to make the plot. The (\*P <0.05, \*\*P <0.01, \*\*\*P <0.005, (compared to the mock-treated cells (without NAM)) by ANOVA test (Dunnnett's test)), n=3. In (F), the mean of duplicate measurements were plotted.
